# Supplementary material
Source: HighWire-hosted journal article supplement (https://rc.rcjournal.com/highwire/filestream/19212/field_highwire_adjunct_files/1/suppl_2.pdf)
Supplement: suppl_2.pdf [file suppl_2.pdf]

## HFNC PRE-EDUCATION SURVEY

---

Before completing the training today, please complete the questions below and on the back side of this page.

1. What is your age? \_\_\_\_\_

2. How many years have you been a nurse? \_\_\_\_\_

3. How many years have you been a nurse with this hospital? \_\_\_\_\_

4. What is your highest level of education? \_\_\_\_\_

5. What is your primary patient floor? \_\_\_\_\_

6. Are you familiar with high flow nasal cannula (HFNC) therapy? Yes No

7. Have you ever cared for a patient placed on HFNC? Yes No

7a. If Yes, how many years of experience do you have with HFNC? \_\_\_\_\_

8. How comfortable would you be caring for a patient who is receiving HFNC?

|                     |                         |        |                           |                       |
|---------------------|-------------------------|--------|---------------------------|-----------------------|
| Very<br>comfortable | Somewhat<br>comfortable | Unsure | Somewhat<br>uncomfortable | Very<br>uncomfortable |
|---------------------|-------------------------|--------|---------------------------|-----------------------|

9. How will the availability of HFNC on your floor make a difference in patient care?

|                                                    |                                                |        |                                                            |                                                        |
|----------------------------------------------------|------------------------------------------------|--------|------------------------------------------------------------|--------------------------------------------------------|
| It will<br>dramatically<br>improve<br>patient care | It will<br>somewhat<br>improve patient<br>care | Unsure | It will make<br>patient care<br>somewhat more<br>difficult | It will make<br>patient care<br>much more<br>difficult |
|----------------------------------------------------|------------------------------------------------|--------|------------------------------------------------------------|--------------------------------------------------------|

*Please turn this sheet over and complete Page 2.*

HFNC stands for **high flow nasal cannula therapy**. It is also referred to as AIRVO or Optiflow. HFNC has been used in the ICU at this hospital since 2012.

**10. Do you think HFNC would be appropriate for a patient on your floor who is:**

|                                                                                         |     |    |          |
|-----------------------------------------------------------------------------------------|-----|----|----------|
| a. Hypoxic (increased oxygen needs)                                                     | Yes | No | Not Sure |
| b. Hypoventilating (i.e., rib fractures and pain, underlying cardiorespiratory disease) | Yes | No | Not Sure |
| c. Diagnosed with obstructive sleep apnea                                               | Yes | No | Not Sure |
| d. Receiving procedural sedation                                                        | Yes | No | Not Sure |
| e. Fluid overloaded (i.e., CHF exacerbation)                                            | Yes | No | Not Sure |
| f. Receiving palliative/comfort care                                                    | Yes | No | Not Sure |
| g. Short of breath / having increased work of breathing                                 | Yes | No | Not Sure |

**11. Please indicate if you agree or disagree with the following statements.**

|                                                                                                                    |       |          |          |
|--------------------------------------------------------------------------------------------------------------------|-------|----------|----------|
| a. HFNC is easier to set-up and use than CPAP.                                                                     | Agree | Disagree | Not Sure |
| b. HFNC is more comfortable for the patient than CPAP.                                                             | Agree | Disagree | Not Sure |
| c. Patients requiring more than 4 L/min of Oxygen or with $\text{FiO}_2 \geq 50\%$ should be cared for in the ICU. | Agree | Disagree | Not Sure |
| d. A patient receiving HFNC should also have continuous monitoring.                                                | Agree | Disagree | Not Sure |
| e. HFNC interferes with patient care, including physical therapy and mobility.                                     | Agree | Disagree | Not Sure |
| f. HFNC is no different than existing therapies on the floor.                                                      | Agree | Disagree | Not Sure |
| g. HFNC would make it difficult for the patient to eat, drink, and sleep.                                          | Agree | Disagree | Not Sure |
